# Supplementary material
Source: PubMed Central journal article supplement (PMC4076753)
Supplement: cmi201125x1.pdf [file cmi201125x1.pdf]

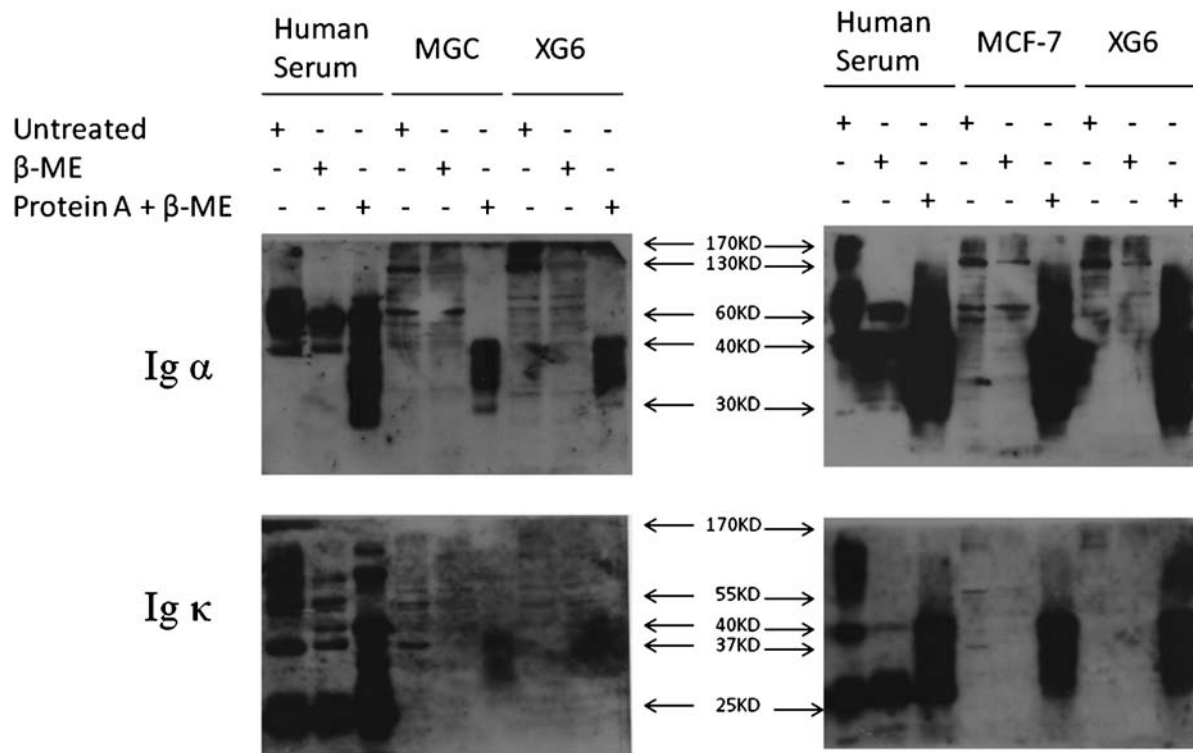

**Supplemental Figure 1** Human serum, MGC cells, MCF-7 cells and XG6 cells were untreated, treated with  $\beta$ -ME, or with protein A plus  $\beta$ -ME. Both the 40- and 60-kDa  $\alpha$ -chains produced by cancer cell lines were aberrant and truncated. The 55-kDa  $\kappa$ -chain was aberrant or at least incapable of binding the heavy chains.  $\beta$ -ME,  $\beta$ -mercaptoethanol; Ig, immunoglobulin.
